# Supplementary material for: Chiral two-dimensional metal–organic frameworks based on Zn(salen) ligands: subcomponent self-assembly and circularly polarised luminescence
Source: Royal Society of Chemistry journal article supplement (doi:10.1039/d2ce01530g), 2022-12-05
Supplement: d2ce01530g1.pdf [file d2ce01530g1.pdf]

## Supplementary Information

### **Chiral two-dimensional metal–organic frameworks based on Zn(salen) ligands: subcomponent self-assembly and circularly polarised luminescence**

Xue-Zhi Wang,<sup>a,c</sup> Chuang-Wei Zhou,<sup>a</sup> Bei Wang,<sup>a</sup> Ya-Liang Lai,<sup>a</sup> Zhao-Xia Lian,<sup>a</sup> Yi-Tong Liu,<sup>a</sup>  
Yan Yan Li<sup>\*b</sup> and Xiao-Ping Zhou<sup>\*a</sup>

<sup>a</sup> *College of Chemistry and Materials Science, Guangdong Provincial Key Laboratory of Functional Supramolecular Coordination Materials and Applications, Jinan University, Guangzhou, Guangdong 510632, P. R. China.*

<sup>b</sup> *Key Laboratory of Biomaterials of Guangdong Higher Education Institutes, Engineering Technology Research Center of Drug Carrier of Guangdong, Department of Biomedical Engineering, Jinan University, Guangzhou 510632, P. R. China.*

<sup>c</sup> *Department of Radiology, The First Affiliated Hospital of Jinan University, Guangzhou 510632, P. R. China.*

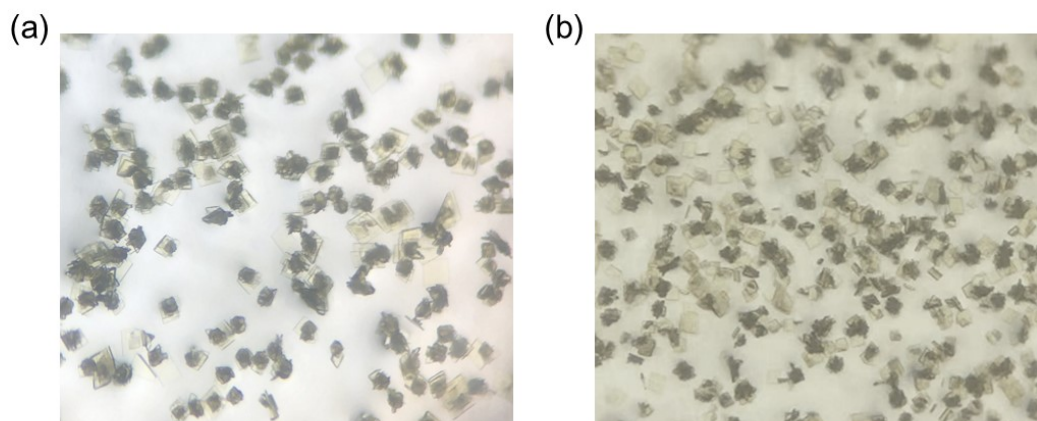

**Fig. S1** Microscopy images of single crystals of the (a) (*R*)-1 and (b) (*S*)-1.

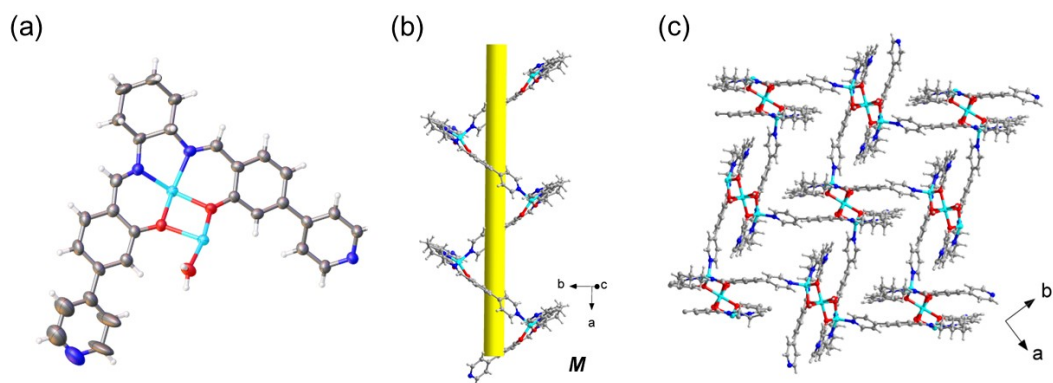

**Fig. S2** Crystal structure of (*S*)-1: (a) The asymmetric unit with 50% probability thermal ellipsoids, (b) left-handed (*M*)  $2_1$  helical chain in (*S*)-1 along the *b*-axis, (d) view of the 2D framework. Color scheme: Zn, cyan; N, blue; C, gray; O, red; H, white.

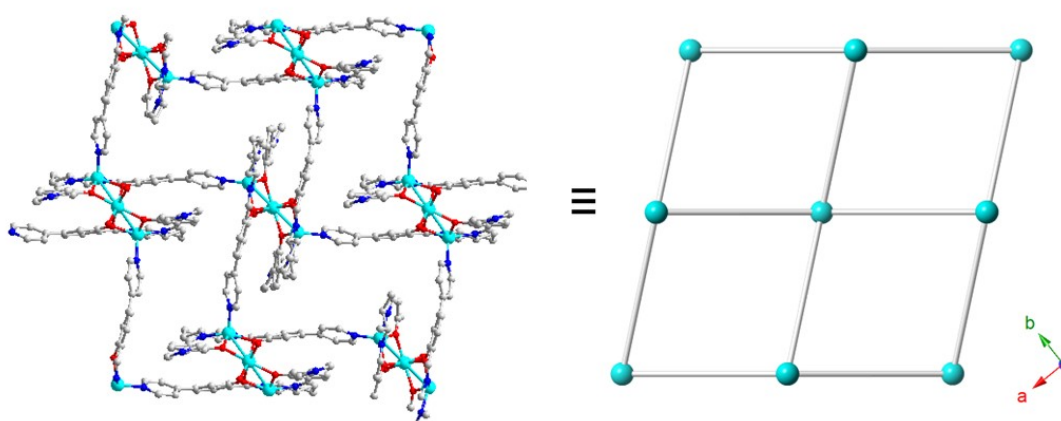

**Fig. S3** Topological net of (*R*)-1 with **sql** topology.

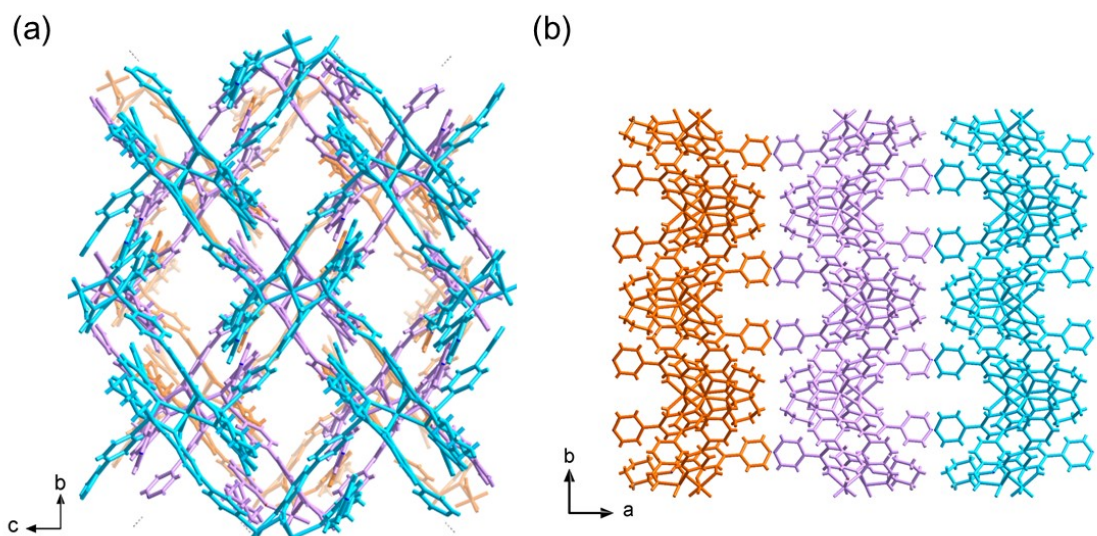

**Fig. S4** Three-dimensional stacking structure of (R)-1 viewed from the (a) a-axis and (b) c-axis. The three layers are labeled lavender, sky blue, and orange, respectively.

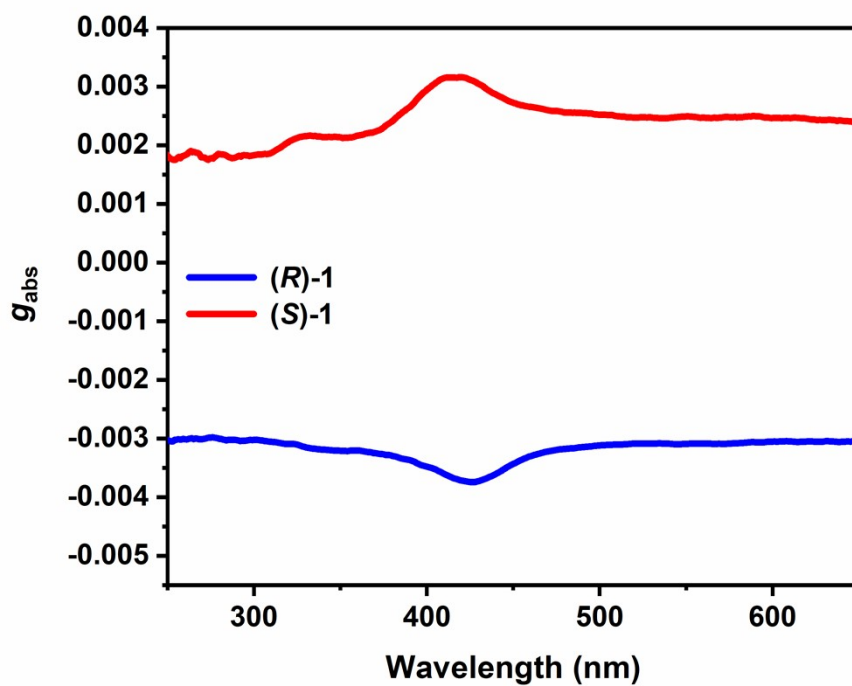

**Fig. S5** The  $g_{\text{abs}}$  spectra of (R)-1 and (S)-1 in the solid state.

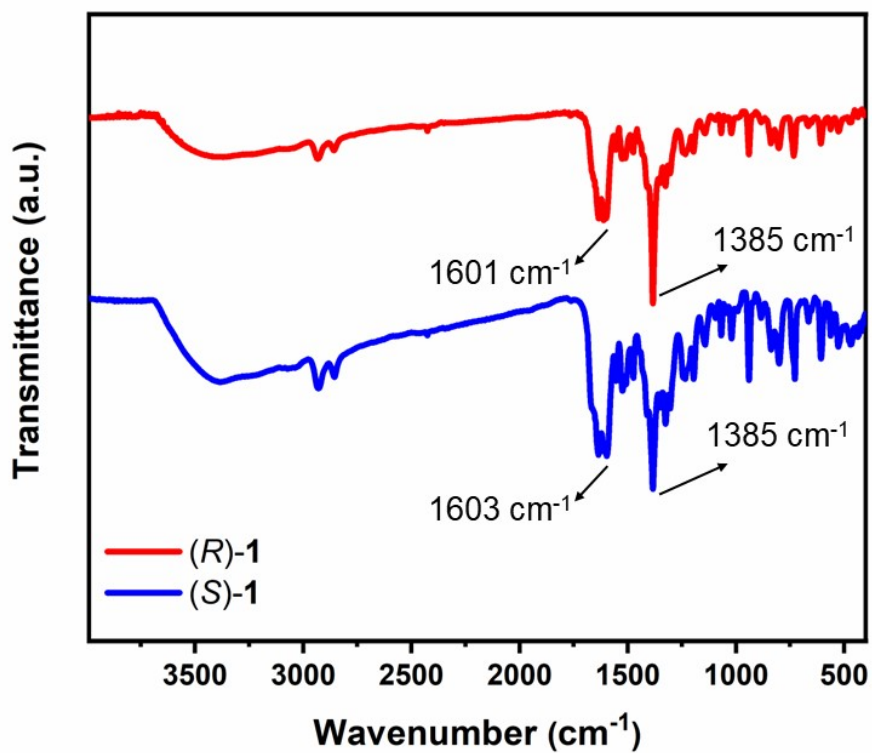

Fig. S6 Fourier-transform infrared spectra of (R)-1 and (S)-1.

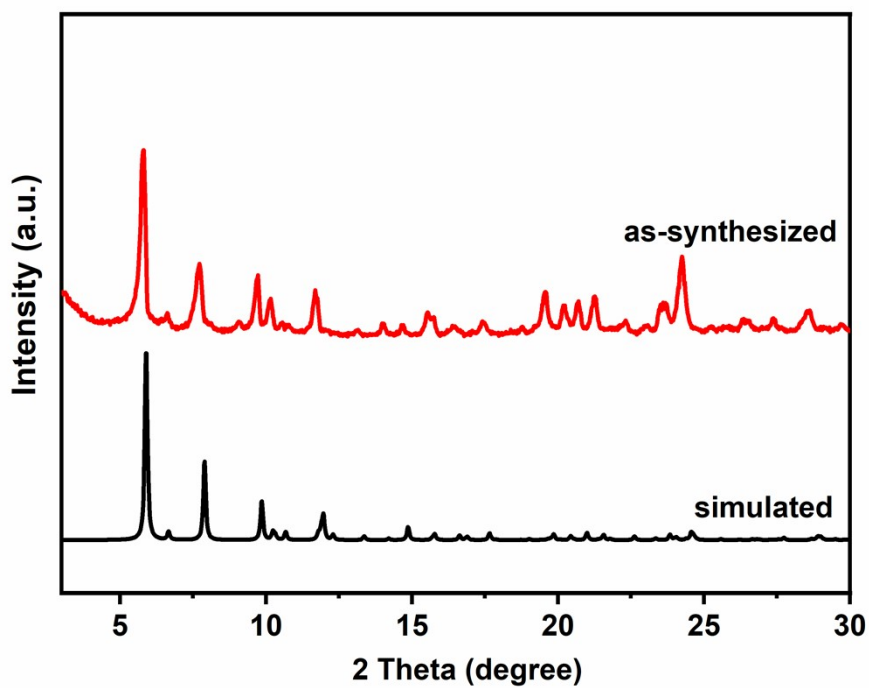

Fig. S7 PXRD pattern of (S)-1 simulated and as-synthesized samples.

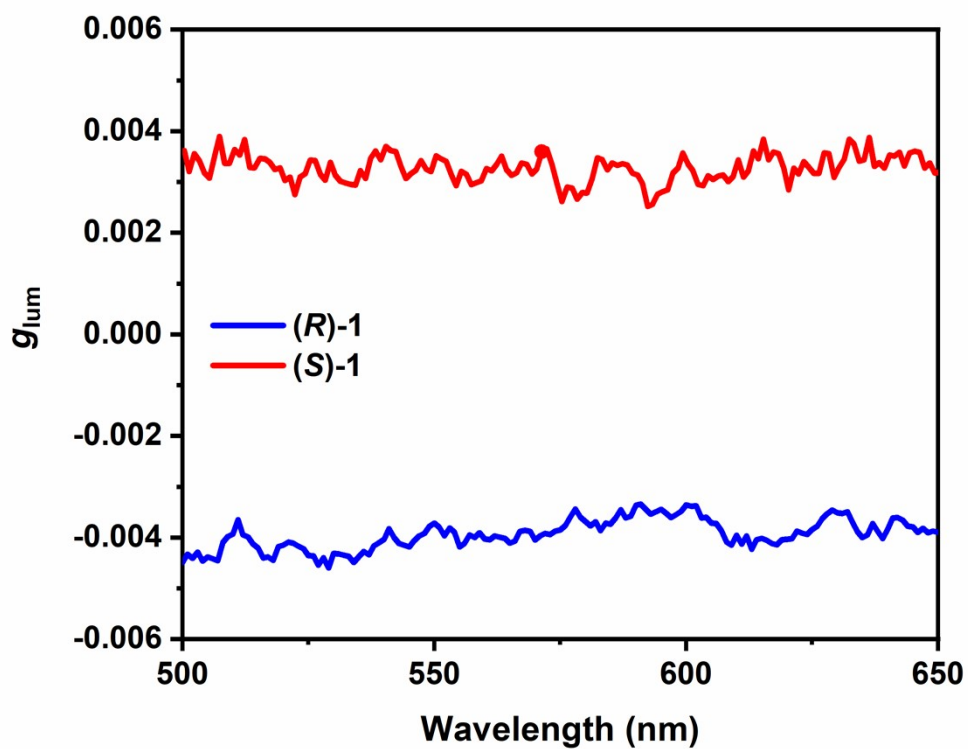

Fig. S8 The  $g_{lum}$  plots of (R)-1 and (S)-1 in the solid state.

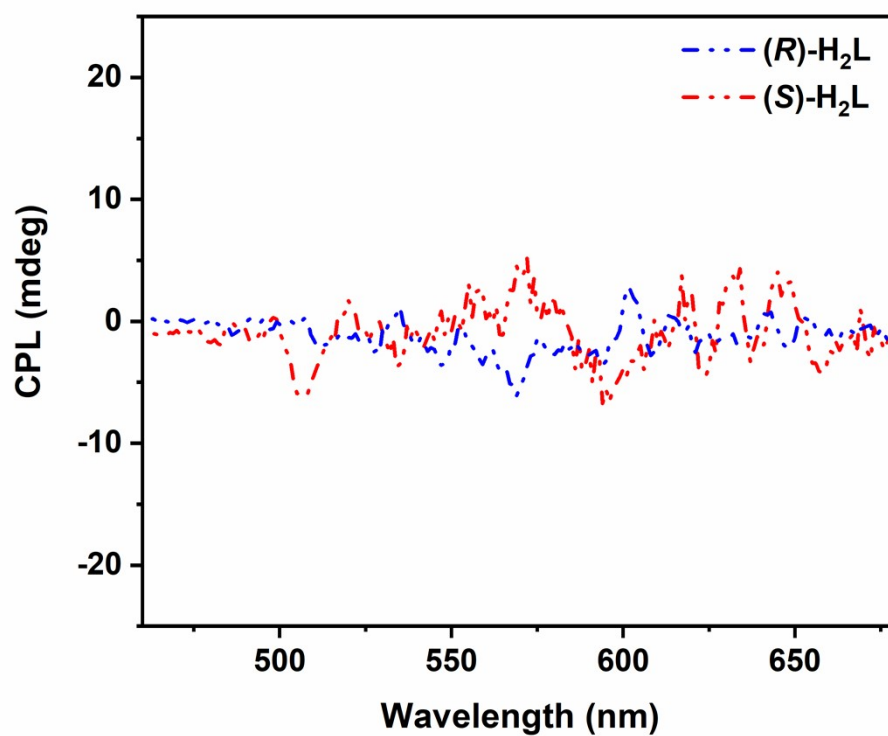

Fig. S9 CPL spectra of (R)-H<sub>2</sub>L and (S)-H<sub>2</sub>L in the solid state.
